# Supplementary material for: Aspergillus fumigatus Supernatants Disrupt Bronchial Epithelial Monolayers: Potential Role for Enhanced Invasion in Cystic Fibrosis
Source: MDPI journal article supplement (doi:10.3390/jof9040490), 2023-04-19
Supplement: s1 [file s1]

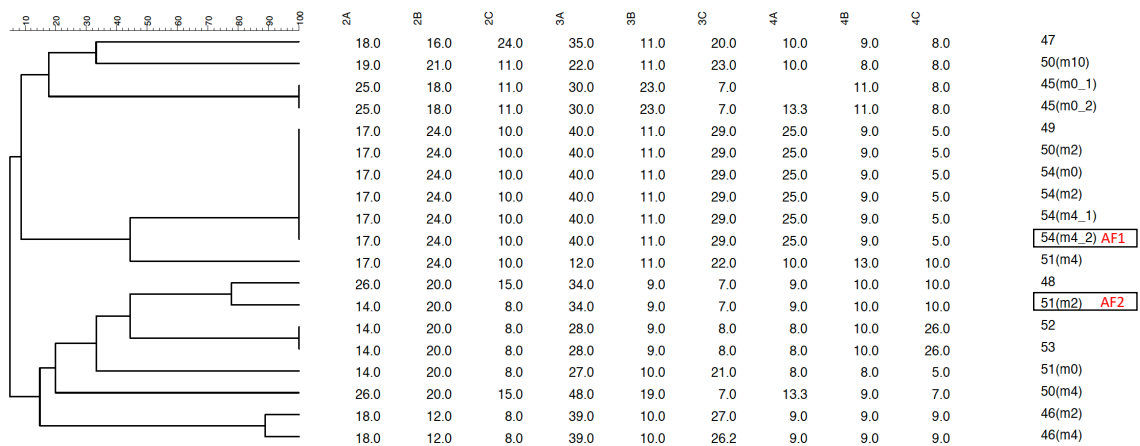

**Figure S1.** STRAf assay typing of *A. fumigatus* isolates from CF patients. Numbers represent patients and m stands for month of sample taken. Marked isolates were used in this study. Patient 54 had samples taken at months 0, 2 and 4 (two colonies picked) and had indistinguishable *A. fumigatus* isolates at all sampling times. Isolate 54(m4\_2) was used as the persistent isolate (AF1) in this study. Patient 51 had samples taken at months 0, 2 and 4 months and had distinguishable isolates at each sampling time. Isolate 51(m2) was used as the non-persistent isolate (AF2) in this study.

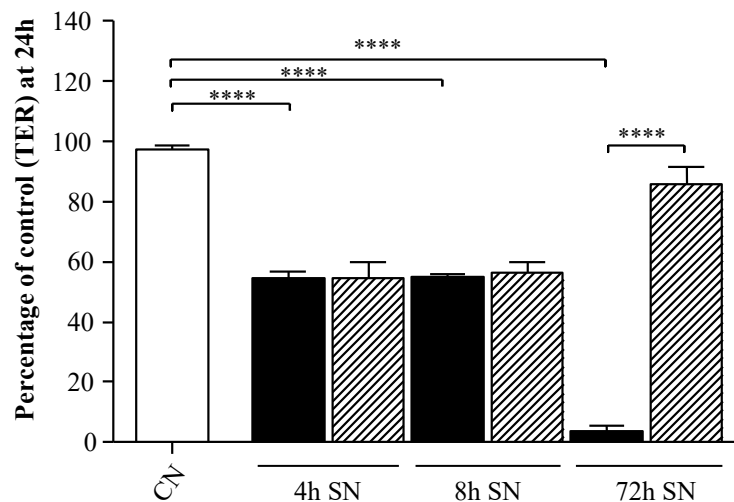

**Figure S2.** Effect of supernatants from *A. fumigatus* and  $\Delta$ gliG cultures on HBE monolayer integrity. TEERs of HBE monolayers following 24 h exposure to supernatants of 4, 8 and 72 h cultures of Af293 (black bars) and  $\Delta$ gliG (bars with diagonal lines). The TEER values of untreated HBE monolayers (CN, white bar) at 24 h were included. Error bars represent standard error of at least three independent replicates. \*\*\*\*  $p < 0.0001$ .
